# Supplementary material for: Gradual Loss of Social Group Support during Competition Activates Anterior TPJ and Insula but Deactivates Default Mode Network
Source: MDPI journal article supplement (doi:10.3390/brainsci13111509), 2023-10-25
Supplement: s1 [file s1]

## Sociodemographic and Psychometric Characteristics

**Supplementary Table S1.** Sociodemographic and Psychometric Characteristics of the Subjects

| Variables                                          |                      | High-support phase           |                            | Ostracism phase                | Comparison           |
|----------------------------------------------------|----------------------|------------------------------|----------------------------|--------------------------------|----------------------|
|                                                    | n (%)                | Mean $\pm$ SD<br>(min-max)   | Mean $\pm$ SD<br>(min-max) | Mean $\pm$ SD<br>(min-max)     |                      |
| Age                                                | N/A                  | 21.7 $\pm$ 1.6<br>(18-24)    | N/A                        | N/A                            | N/A                  |
| Gender                                             |                      | N/A                          | N/A                        | N/A                            | N/A                  |
| Female                                             | 10 (55.6)            |                              |                            |                                |                      |
| Male                                               | 8 (44.4)             |                              |                            |                                |                      |
| Rosenberg Self-Esteem Scale                        | N/A                  | 21.6 $\pm$ 3.6<br>(16-27)    | N/A                        | N/A                            | N/A                  |
| Multidimensional Scale of Perceived Social Support | N/A                  | 64.6 $\pm$ 13.8<br>(43-84)   | N/A                        | N/A                            | N/A                  |
| Inventory of Socially Supportive Behaviors         | N/A                  | 141.8 $\pm$ 25.9<br>(95-194) | N/A                        | N/A                            | N/A                  |
| Need-Threat Scale                                  | Subscale             |                              |                            |                                |                      |
|                                                    | Belonging            |                              | 3.75 $\pm$ .74 (2.80-5.00) | 2.91 $\pm$ 1.00<br>(1.00-4.60) | Z= -3.082<br>p=.002  |
|                                                    | Self-Esteem          |                              | 3.92 $\pm$ .71 (2.80-5.00) | 2.60 $\pm$ .79<br>(1.00-4.00)  | Z = -3.415<br>p=.001 |
|                                                    | Meaning of existence |                              | 4.06 $\pm$ .70 (2.60-5.00) | 3.13 $\pm$ .88<br>(1.00-4.60)  | Z = -2.923<br>p=.003 |
|                                                    | Control              |                              | 3.04 $\pm$ .75 (1.00-4.20) | 2.55 $\pm$ .76<br>(1.20-3.60)  | Z = -2.885<br>p=.004 |
| Emotional status <sup>a</sup>                      |                      | <i>Before the Study</i>      | <i>After the Study</i>     |                                |                      |
|                                                    | Motivation           |                              | 8.58 $\pm$ 1.46 (6-10)     | 8.29 $\pm$ 1.79 (5-10)         | Z= -.406<br>p=.685   |
|                                                    | Happiness            |                              | 8.47 $\pm$ 1.84 (5-10)     | 8.70 $\pm$ 1.79 (4-10)         | Z = -.731<br>p=.465  |
|                                                    | Sadness              |                              | 1.58 $\pm$ 1.06 (1-5)      | 2.23 $\pm$ 1.88 (1-7)          | Z = -1.420<br>p=.156 |
|                                                    | Fear                 |                              | 3.00 $\pm$ 2.44 (1-8)      | 2.11 $\pm$ 2.44 (1-10)         | Z = -1.231<br>p=.218 |
|                                                    | Anger                |                              | 1.11 $\pm$ .33 (1-2)       | 1.52 $\pm$ 1.28 (1-6)          | Z = -1.289<br>p=.197 |

<sup>a</sup>VAS: Visual analog scale (1-10), N/A: Not applicable

**Supplementary Table S2.** Distribution of the Images Used in the Experiment According to the Difficulty Level

| Image Group | Correct or Incorrect Answers |   | Score Difference | The number and percentage of images used in the HSP | The number and percentage of images used in the FP | The number and percentage of images used in the OP |
|-------------|------------------------------|---|------------------|-----------------------------------------------------|----------------------------------------------------|----------------------------------------------------|
| 1           | ✓                            | ✓ | <1               | 5 20%                                               | 5 20%                                              | 5 20%                                              |
| 2           | ✓                            | ✗ | <1               | 4 16%                                               | 5 20%                                              | 6 24%                                              |
| 3           | ✗                            | ✓ | <1               | 7 28%                                               | 3 12%                                              | 5 20%                                              |
| 4           | ✗                            | ✗ | <1               | 5 20 %                                              | 5 20%                                              | 5 20%                                              |
| 5           | ✓                            | ✓ | >3               | 1 4%                                                | 2 8%                                               | 1 4%                                               |
| 6           | ✓                            | ✗ | >3               | 0                                                   | 1 4%                                               | 2 8%                                               |
| 7           | ✗                            | ✓ | >3               | 2 8%                                                | 2 8%                                               | 0                                                  |
| 8           | ✗                            | ✗ | >3               | 1 4%                                                | 2 8%                                               | 1 4%                                               |
|             |                              |   |                  | Total difficult image ratio: 84%                    | Total difficult image ratio: 72%                   | Total difficult image ratio: 84%                   |
|             |                              |   |                  | easy image ratio: 16%                               | easy image ratio: 28%                              | easy image ratio: 16%                              |
|             |                              |   |                  | Win rate in difficult images: 72% lose: 12%         | Win rate in difficult images: 40% lose: 32%        | Win rate in difficult images: 12% lose: 72%        |
